# Supplementary material for: Reactivated endogenous retroviruses promote protein aggregate spreading
Source: PubMed Central journal article supplement (PMC10439213; doi:10.1038/s41467-023-40632-z), 2023-08-18
Supplement: 41467_2023_40632_MOESM3_ESM.pdf [file 41467_2023_40632_MOESM3_ESM.pdf]

## **Description of Additional Supplementary Files**

File Name: Supplementary Data 1

Description: Proteomic results of cell lysates comparing P16 and P07, and proteomic results of extracellular vesicle comparing P15 and P06.
