# Supplementary material for: Reactivated endogenous retroviruses promote protein aggregate spreading
Source: PubMed Central journal article supplement (PMC10439213; doi:10.1038/s41467-023-40632-z), 2023-08-18
Supplement: 41467_2023_40632_MOESM5_ESM.pdf [file 41467_2023_40632_MOESM5_ESM.pdf]

## Reporting Summary

Nature Portfolio wishes to improve the reproducibility of the work that we publish. This form provides structure for consistency and transparency in reporting. For further information on Nature Portfolio policies, see our [Editorial Policies](#) and the [Editorial Policy Checklist](#).

### Statistics

For all statistical analyses, confirm that the following items are present in the figure legend, table legend, main text, or Methods section.

n/a Confirmed

- The exact sample size ( $n$ ) for each experimental group/condition, given as a discrete number and unit of measurement
- A statement on whether measurements were taken from distinct samples or whether the same sample was measured repeatedly
- The statistical test(s) used AND whether they are one- or two-sided  
*Only common tests should be described solely by name; describe more complex techniques in the Methods section.*
- A description of all covariates tested
- A description of any assumptions or corrections, such as tests of normality and adjustment for multiple comparisons
- A full description of the statistical parameters including central tendency (e.g. means) or other basic estimates (e.g. regression coefficient) AND variation (e.g. standard deviation) or associated estimates of uncertainty (e.g. confidence intervals)
- For null hypothesis testing, the test statistic (e.g.  $F$ ,  $t$ ,  $r$ ) with confidence intervals, effect sizes, degrees of freedom and  $P$  value noted  
*Give  $P$  values as exact values whenever suitable.*
- For Bayesian analysis, information on the choice of priors and Markov chain Monte Carlo settings
- For hierarchical and complex designs, identification of the appropriate level for tests and full reporting of outcomes
- Estimates of effect sizes (e.g. Cohen's  $d$ , Pearson's  $r$ ), indicating how they were calculated

*Our web collection on [statistics for biologists](#) contains articles on many of the points above.*

### Software and code

Policy information about [availability of computer code](#)

|                 |                                                                                                                                                                                                                                                                                                                                                                                                                                                                                                                                                                                                                                          |
|-----------------|------------------------------------------------------------------------------------------------------------------------------------------------------------------------------------------------------------------------------------------------------------------------------------------------------------------------------------------------------------------------------------------------------------------------------------------------------------------------------------------------------------------------------------------------------------------------------------------------------------------------------------------|
| Data collection | Automated confocal microscope Cellvoyager CV6000 (Yokogawa Inc.)<br>Q-Exact mass spectrometer (Thermo Scientific, US)<br>JEOL JEM-2200FS transmission electron microscope at 200 kV (JEOL)<br>Confocal laser scanning microscope LSM800 with Airyscan (Zeiss)<br>Imaging system Fusion FX (Evolution-Capt. Edge Ink, Vilber Lourmat)<br>Plate reader Fluostar Omega BMG (BMG Labtech)<br>ZetaView PMX 110-SZ-488 Nano Particle Tracking Analyzer (Measurement and Automation.Ink, Particle Metrix GmbH)                                                                                                                                  |
| Data analysis   | Automated image analysis was performed with Cellvoyager Analysis support software (Yokogawa Inc.: CV7000 Analysis Software; Version 3.5.1.18)<br>Confocal microscope images were analyzed via Zen 2010 (3.1, Blue Edition, ZenBlue, Zeiss)<br>Plate reader data was analyzed using MARS Data Analysis Software (Version: 3.40 R2, BMG Labtech)<br>Western Blot quantifications were done using Image J (Version 2.00-rc-69/1.52p)<br>MassSpec data were analyzed using Maxquant Software (maxquant.org, Max Planck Institute Munich, Version 1.5.5.1)<br>Statistical analyses were performed using Prism 6.0 (GraphPad Software v.7.0c). |

For manuscripts utilizing custom algorithms or software that are central to the research but not yet described in published literature, software must be made available to editors and reviewers. We strongly encourage code deposition in a community repository (e.g. GitHub). See the Nature Portfolio [guidelines for submitting code & software](#) for further information.

## Data

Policy information about [availability of data](#)

All manuscripts must include a [data availability statement](#). This statement should provide the following information, where applicable:

- Accession codes, unique identifiers, or web links for publicly available datasets
- A description of any restrictions on data availability
- For clinical datasets or third party data, please ensure that the statement adheres to our [policy](#)

The mass spectrometry proteomics data generated in this study (Figure 1h and i) are available via the ProteomeXchange Consortium through the PRIDE partner repository under the accession code PXD043201. The following vector plasmids are deposited on Addgene for distribution (<http://www.addgene.org>) #15802, #15805, #35614, #17576#12253#12259#12251. The MS data was searched against a FASTA database of *Mus musculus* from UniProt including also non-reviewed entries supplemented with databases of lentiviruses and murine leukemia viruses (download: December 09th 2017, 52041 + 712 + 43 entries, <https://www.uniprot.org/>). Sequence data used for plasmid generation can be accessed under accession codes: AY037928; CAB94193.2; Q9N2K0.1; AAD34324.1; AAA88027.1 and AAF28334. The authors declare, that the remaining raw data or sequence information supporting the findings of this study are provided within the manuscript, methods section, its Supplementary Information or Source Data file and any other raw data that is not mentioned and that may be necessary to describe our work will be made available upon request.. Source data are provided with this paper.

## Research involving human participants, their data, or biological material

Policy information about studies with [human participants or human data](#). See also policy information about [sex, gender \(identity/presentation\), and sexual orientation](#) and [race, ethnicity and racism](#).

|                                                                    |                |
|--------------------------------------------------------------------|----------------|
| Reporting on sex and gender                                        | not applicable |
| Reporting on race, ethnicity, or other socially relevant groupings | not applicable |
| Population characteristics                                         | not applicable |
| Recruitment                                                        | not applicable |
| Ethics oversight                                                   | not applicable |

Note that full information on the approval of the study protocol must also be provided in the manuscript.

## Field-specific reporting

Please select the one below that is the best fit for your research. If you are not sure, read the appropriate sections before making your selection.

- Life sciences       Behavioural & social sciences       Ecological, evolutionary & environmental sciences

For a reference copy of the document with all sections, see [nature.com/documents/nr-reporting-summary-flat.pdf](https://www.nature.com/documents/nr-reporting-summary-flat.pdf)

## Life sciences study design

All studies must disclose on these points even when the disclosure is negative.

|                 |                                                                                                                                                                                                                                                                                                                                                                                                                                                                             |
|-----------------|-----------------------------------------------------------------------------------------------------------------------------------------------------------------------------------------------------------------------------------------------------------------------------------------------------------------------------------------------------------------------------------------------------------------------------------------------------------------------------|
| Sample size     | Sample size was determined based on empirical data from the existing publications and experience in similar studies performed previously by our laboratory and the DZNE laboratory automation facility (Duernberger et al. 2018, doi: 10.1128/MCB.00111-18).                                                                                                                                                                                                                |
| Data exclusions | No data was excluded from analyses.                                                                                                                                                                                                                                                                                                                                                                                                                                         |
| Replication     | 6 wells with cells were analyzed per coculture experiment (n=6). 3 wells were analyzed per EV experiment (n=3). For quantitative analysis, at least 6000 cells were analyzed. Experiments were repeated at least twice, with similar results, except for experiments with conditioned medium of donors transfected with MLV gag/pol and env constructs (Fig. 6p). Two independent experiments, with similar results, with quantitative analysis performed after 4h and 24h. |
| Randomization   | Allocation of cell culture populations cocultured or exposed to extracellular vesicles (EV) obtained from target cells or EV obtained from control cells treated with inhibitors, lentiviral infections, and transfections were randomly administered to cell populations that were otherwise cultured identically prior to the experiments.                                                                                                                                |
| Blinding        | No blinding was done. Automated image acquisition and analysis was performed to minimize bias                                                                                                                                                                                                                                                                                                                                                                               |

## Behavioural & social sciences study design

All studies must disclose on these points even when the disclosure is negative.

|                   |                |
|-------------------|----------------|
| Study description | not applicable |
| Research sample   | not applicable |
| Sampling strategy | not applicable |
| Data collection   | not applicable |
| Timing            | not applicable |
| Data exclusions   | not applicable |
| Non-participation | not applicable |
| Randomization     | not applicable |

## Ecological, evolutionary & environmental sciences study design

All studies must disclose on these points even when the disclosure is negative.

|                          |                |
|--------------------------|----------------|
| Study description        | not applicable |
| Research sample          | not applicable |
| Sampling strategy        | not applicable |
| Data collection          | not applicable |
| Timing and spatial scale | not applicable |
| Data exclusions          | not applicable |
| Reproducibility          | not applicable |
| Randomization            | not applicable |
| Blinding                 | not applicable |

Did the study involve field work?  Yes  No

## Field work, collection and transport

|                        |                |
|------------------------|----------------|
| Field conditions       | not applicable |
| Location               | not applicable |
| Access & import/export | not applicable |
| Disturbance            | not applicable |

## Reporting for specific materials, systems and methods

We require information from authors about some types of materials, experimental systems and methods used in many studies. Here, indicate whether each material, system or method listed is relevant to your study. If you are not sure if a list item applies to your research, read the appropriate section before selecting a response.

## Materials &amp; experimental systems

| n/a                                 | Involved in the study                                     |
|-------------------------------------|-----------------------------------------------------------|
| <input type="checkbox"/>            | <input checked="" type="checkbox"/> Antibodies            |
| <input type="checkbox"/>            | <input checked="" type="checkbox"/> Eukaryotic cell lines |
| <input checked="" type="checkbox"/> | <input type="checkbox"/> Palaeontology and archaeology    |
| <input checked="" type="checkbox"/> | <input type="checkbox"/> Animals and other organisms      |
| <input checked="" type="checkbox"/> | <input type="checkbox"/> Clinical data                    |
| <input checked="" type="checkbox"/> | <input type="checkbox"/> Dual use research of concern     |
| <input checked="" type="checkbox"/> | <input type="checkbox"/> Plants                           |

## Methods

| n/a                                 | Involved in the study                           |
|-------------------------------------|-------------------------------------------------|
| <input checked="" type="checkbox"/> | <input type="checkbox"/> ChIP-seq               |
| <input checked="" type="checkbox"/> | <input type="checkbox"/> Flow cytometry         |
| <input checked="" type="checkbox"/> | <input type="checkbox"/> MRI-based neuroimaging |

## Antibodies

## Antibodies used

rat hybridoma anti-MLV Env (mAb83A25, 1:10; kindly provided by L.H. Evans, Rocky Mountain Laboratories, MT)  
 goat anti-xenotropic MLV virus antibody (antibodies-online, ABIN457298, 1:1000)  
 mouse anti-MLV gag (Abcam, ab100970, 1:1000)  
 rat anti-HA (Roche, 3F10, lot: 42155800, 1:1000)  
 mouse anti-GAPDH 6C5 (Abcam, ab8245, lot: GR3275542-4, 1:5000)  
 mouse anti-Actin C4 (MP Biomedical, 691001, 1:5000)  
 rabbit anti-Tau (Abcam, ab64193, lot: GR3275542-1, 1:1000)  
 mouse anti-Pit-2 (Santa Cruz Biotechnology, B-4, sc-377326, 1:1000)  
 rabbit anti-V5 (Cell signaling, D3H8Q, Lot: 6, 1:1000)  
 mouse anti-Alix (BD Bioscience, 611620, lot: 6217567, 1:1000)  
 mouse anti-Hsc/Hsp70 (ENZO, N27F3-4, lot: 09061121, 1:1000)  
 rabbit anti-Flotillin1 (Abcam, ab133497, lot: GR217473-1, 1:1000)  
 Alexa Fluor 647 goat anti-rat IgG (Invitrogen, A21247, lot: 1858181, 1:800)  
 anti-mouse horseradish peroxidase (HRP)-conjugated secondary AB (Dianova, 115-035-003; 1:10.000)  
 anti-rat HRP-conjugated secondary AB (Dianova, 112-035-003; 1:10.000)  
 anti-rabbit HRP-conjugated secondary AB (Dianova, 111-035-003; 1:10.000)

## Validation

Commercially available antibodies were used according to the data sheets provided by the manufacturers for each assay.  
 Validation: Anti-MLV Env (rat hybridoma, mAb83A25) was generated and validated by Evans et. Al., Rocky Mountain Laboratories, MT). The details can be found in the following article: Evans LH, Morrison RP, Alik FG, Portis J, Britt WJ. A. A neutralizable epitope common to the envelope glycoproteins of ecotropic, polytropic, xenotropic, and amphotropic murine leukemia viruses. *J Virol* 64, 6176-6183 (1990).  
 Goat anti-xenotropic MLV virus antibody (antibodies-online, ABIN457298). In-house validation by WB, detecting appropriate size protein. <https://www.citeab.com/antibodies/2676035-abin457298-anti-xenotropic-murine-leukemia-virus-gp7>  
 Mouse anti-MLV gag (Abcam, ab100970). Suitable for WB, ELISA. Reacts with murine leukemia virus GAG p30 capsid protein. 6 references provided by supplier (Abcam). In-house validation by WB, detecting appropriate size protein. <https://www.abcam.com/products/primary-antibodies/gag-antibody-ab100970.html>  
 rat anti-HA (Roche, 3F10, lot: 42155800). In-house validation by WB of ectopically expressed HA-tagged proteins. <https://www.sigmaaldrich.com/DE/de/product/roche/12158167001>  
 mouse anti-GAPDH (Abcam, ab8245, clone 6C5, lot :GR3275542-4). Suitable for WB, ICC/IF (2735 references provided by Abcam). Reacts with mouse, rat, human. In-house validation by WB, detecting appropriate size protein. <https://www.abcam.com/products/primary-antibodies/gapdh-antibody-6c5-loading-control-ab8245.html>  
 Mouse anti-Actin (MP Biomedical, 691001, C4). Reacts with human, mouse, rat and guinea pig. Suitable for WB, ICC/IF. In-house validation by WB detecting correct size protein. <https://www.mpbio.com/bs/anti-actin-mouse-monoclonal-antibody-clone-c4>  
 rabbit anti-Tau (Abcam, ab64193, lot: GR3244995-1). Suitable for WB, ICC. Reacts with mouse, zebrafish. 55 references provided by supplier (Abcam). In house validation WB of ectopically expressed Tau. <https://www.citeab.com/antibodies/753638-ab64193-anti-tau-antibody>  
 Mouse anti-Pit-2 (Santa Cruz Biotechnology, sc-377326). Suitable for WB, ICC/IF, ELISA, IP. (9 references provided by Santa Cruz Biotechnology). Reacts with mouse, rat, human. In-house validation by WB, detecting appropriate size protein. <https://www.scbt.com/de/p/pit2-antibody-b-4>  
 Rabbit anti-V5 (Cell Signaling, D3H8Q, Lot: 6). In-house validation by WB of ectopically expressed V5-tagged proteins. <https://www.cellsignal.com/products/primary-antibodies/v5-tag-d3h8q-rabbit-mab/13202>  
 mouse anti-Alix (BD Bioscience, 611620, lot: 6217567). In-house validation by WB, detecting appropriate size protein. <https://www.bdbiosciences.com/en-br/products/reagents/western-blotting-and-molecular-reagents/western-blot-reagents/purified-mouse-anti-aip1.611620>  
 mouse anti-Hsc/Hsp70 (ENZO, N27F3-4, lot 09061121). Reacts with human, mouse, rat and others. Suitable for Flow Cytometry, IHC (PS), IP, WB. In-house validation by WB detecting correct size protein. <https://www.enzolifesciences.com/ADI-SPA-820/hsc70-hsp70-monoclonal-antibody-n27f3-4/>  
 rabbit anti-Flotillin1 (Abcam, ab133497, clone EPR6041, lot: GR217473-1). Suitable for WB, IHC-P, IP, ICC/IF. Knock-out validated. Reacts with mouse, rat, human. 23 references provided by Abcam). In-house validated by WB, detecting appropriate size protein. <https://www.abcam.com/products/primary-antibodies/flotillin-1-antibody-epr6041-ab133497.html>  
 Uncropped gel images are provided with the manuscript source data.

## Eukaryotic cell lines

Policy information about [cell lines and Sex and Gender in Research](#)

|                                                                   |                                                                                                                                                                                                                                                                            |
|-------------------------------------------------------------------|----------------------------------------------------------------------------------------------------------------------------------------------------------------------------------------------------------------------------------------------------------------------------|
| Cell line source(s)                                               | HEK 293T and Neuro-2a cells were purchased from ATCC. Vero cells were purchased from CLS (Cell lines service). Human astrocytes (Cat No.: 1800; Lot No.: 25536) were purchased from ScienCell Research Laboratories. Melan-a cells were purchased from Wellcome Trust, UK. |
| Authentication                                                    | All cell lines from ATCC, CLS and Wellcome Trust were authenticated via Short tandem repeat (STR) profiling.                                                                                                                                                               |
| Mycoplasma contamination                                          | All cell lines were regularly tested for mycoplasma using PCR Mycoplasma Test Kit II A8994 (PanReac AppliChem), lot 11151118. Cell lines were free of mycoplasma contamination.                                                                                            |
| Commonly misidentified lines (See <a href="#">ICLAC</a> register) | None.                                                                                                                                                                                                                                                                      |

## Palaeontology and Archaeology

|                                                                                                                                                 |                |
|-------------------------------------------------------------------------------------------------------------------------------------------------|----------------|
| Specimen provenance                                                                                                                             | not applicable |
| Specimen deposition                                                                                                                             | not applicable |
| Dating methods                                                                                                                                  | not applicable |
| <input type="checkbox"/> Tick this box to confirm that the raw and calibrated dates are available in the paper or in Supplementary Information. |                |
| Ethics oversight                                                                                                                                | not applicable |

Note that full information on the approval of the study protocol must also be provided in the manuscript.

## Animals and other research organisms

Policy information about [studies involving animals; ARRIVE guidelines](#) recommended for reporting animal research, and [Sex and Gender in Research](#)

|                         |                                                                                                                                                                                                                                                                                                                                                                                              |
|-------------------------|----------------------------------------------------------------------------------------------------------------------------------------------------------------------------------------------------------------------------------------------------------------------------------------------------------------------------------------------------------------------------------------------|
| Laboratory animals      | RjOri:SWISS Mus musculus outbreed (Janvier-Labs, France).                                                                                                                                                                                                                                                                                                                                    |
| Wild animals            | not applicable                                                                                                                                                                                                                                                                                                                                                                               |
| Reporting on sex        | Sex was not considered for preparation of cortical neuronal cultures.                                                                                                                                                                                                                                                                                                                        |
| Field-collected samples | not applicable                                                                                                                                                                                                                                                                                                                                                                               |
| Ethics oversight        | SWISS Mice were housed and handled according to standards of the German Animal Welfare Act (23 °C, 40–50 % humidity, ad libitum access to food and water) with a 12 hours light/dark cycle. Mice were euthanized according to the German Animal Welfare Act for organ harvest according to § 4 Abs. 3 TierSchG. Since this procedure only needs to be notified, there is no protocol number. |

Note that full information on the approval of the study protocol must also be provided in the manuscript.

## Clinical data

Policy information about [clinical studies](#)

All manuscripts should comply with the ICMJE [guidelines for publication of clinical research](#) and a completed [CONSORT checklist](#) must be included with all submissions.

|                             |                |
|-----------------------------|----------------|
| Clinical trial registration | not applicable |
| Study protocol              | not applicable |
| Data collection             | not applicable |
| Outcomes                    | not applicable |

## Dual use research of concern

Policy information about [dual use research of concern](#)

### Hazards

Could the accidental, deliberate or reckless misuse of agents or technologies generated in the work, or the application of information presented in the manuscript, pose a threat to:

- | No                                  | Yes                                                 |
|-------------------------------------|-----------------------------------------------------|
| <input checked="" type="checkbox"/> | <input type="checkbox"/> Public health              |
| <input checked="" type="checkbox"/> | <input type="checkbox"/> National security          |
| <input checked="" type="checkbox"/> | <input type="checkbox"/> Crops and/or livestock     |
| <input checked="" type="checkbox"/> | <input type="checkbox"/> Ecosystems                 |
| <input checked="" type="checkbox"/> | <input type="checkbox"/> Any other significant area |

### Experiments of concern

Does the work involve any of these experiments of concern:

- | No                                  | Yes                                                                                                  |
|-------------------------------------|------------------------------------------------------------------------------------------------------|
| <input checked="" type="checkbox"/> | <input type="checkbox"/> Demonstrate how to render a vaccine ineffective                             |
| <input checked="" type="checkbox"/> | <input type="checkbox"/> Confer resistance to therapeutically useful antibiotics or antiviral agents |
| <input checked="" type="checkbox"/> | <input type="checkbox"/> Enhance the virulence of a pathogen or render a nonpathogen virulent        |
| <input checked="" type="checkbox"/> | <input type="checkbox"/> Increase transmissibility of a pathogen                                     |
| <input checked="" type="checkbox"/> | <input type="checkbox"/> Alter the host range of a pathogen                                          |
| <input checked="" type="checkbox"/> | <input type="checkbox"/> Enable evasion of diagnostic/detection modalities                           |
| <input checked="" type="checkbox"/> | <input type="checkbox"/> Enable the weaponization of a biological agent or toxin                     |
| <input checked="" type="checkbox"/> | <input type="checkbox"/> Any other potentially harmful combination of experiments and agents         |

## Plants

- |                       |                |
|-----------------------|----------------|
| Seed stocks           | not applicable |
| Novel plant genotypes | not applicable |
| Authentication        | not applicable |

## ChIP-seq

### Data deposition

- Confirm that both raw and final processed data have been deposited in a public database such as [GEO](#).
- Confirm that you have deposited or provided access to graph files (e.g. BED files) for the called peaks.

- |                                                                    |                |
|--------------------------------------------------------------------|----------------|
| Data access links<br><i>May remain private before publication.</i> | not applicable |
| Files in database submission                                       | not applicable |
| Genome browser session<br>(e.g. <a href="#">UCSC</a> )             | not applicable |

### Methodology

- |                  |                |
|------------------|----------------|
| Replicates       | not applicable |
| Sequencing depth | not applicable |
| Antibodies       | not applicable |

|                         |                |
|-------------------------|----------------|
| Peak calling parameters | not applicable |
| Data quality            | not applicable |
| Software                | not applicable |

## Flow Cytometry

### Plots

Confirm that:

- The axis labels state the marker and fluorochrome used (e.g. CD4-FITC).
- The axis scales are clearly visible. Include numbers along axes only for bottom left plot of group (a 'group' is an analysis of identical markers).
- All plots are contour plots with outliers or pseudocolor plots.
- A numerical value for number of cells or percentage (with statistics) is provided.

### Methodology

|                           |                |
|---------------------------|----------------|
| Sample preparation        | not applicable |
| Instrument                | not applicable |
| Software                  | not applicable |
| Cell population abundance | not applicable |
| Gating strategy           | not applicable |

- Tick this box to confirm that a figure exemplifying the gating strategy is provided in the Supplementary Information.

## Magnetic resonance imaging

### Experimental design

|                                 |                |
|---------------------------------|----------------|
| Design type                     | not applicable |
| Design specifications           | not applicable |
| Behavioral performance measures | not applicable |

### Acquisition

|                               |                                                                            |
|-------------------------------|----------------------------------------------------------------------------|
| Imaging type(s)               | not applicable                                                             |
| Field strength                | not applicable                                                             |
| Sequence & imaging parameters | not applicable                                                             |
| Area of acquisition           | not applicable                                                             |
| Diffusion MRI                 | <input type="checkbox"/> Used <input checked="" type="checkbox"/> Not used |

### Preprocessing

|                            |                |
|----------------------------|----------------|
| Preprocessing software     | not applicable |
| Normalization              | not applicable |
| Normalization template     | not applicable |
| Noise and artifact removal | not applicable |
| Volume censoring           | not applicable |

## Statistical modeling &amp; inference

Model type and settings

Effect(s) tested

Specify type of analysis:  Whole brain  ROI-based  Both

Statistic type for inference   
(See [Eklund et al. 2016](#))

Correction

## Models &amp; analysis

| n/a                                 | Involved in the study                                                 |                                             |
|-------------------------------------|-----------------------------------------------------------------------|---------------------------------------------|
| <input checked="" type="checkbox"/> | <input type="checkbox"/> Functional and/or effective connectivity     | <input type="text" value="not applicable"/> |
| <input checked="" type="checkbox"/> | <input type="checkbox"/> Graph analysis                               | <input type="text" value="not applicable"/> |
| <input checked="" type="checkbox"/> | <input type="checkbox"/> Multivariate modeling or predictive analysis | <input type="text" value="not applicable"/> |
